# Supplementary material
Source: ML conference proceedings conference paper supplement (https://proceedings.mlr.press/v139/sander21a.html)
Supplement: Supplementary file 1 [file sander21a-supp.pdf]

---

## Appendix

---

In Section **A** we give the proofs of all the Propositions and the Theorem. In Section **B** we give other theoretical results to validate statements made in the paper. Section **C** presents the algorithm from [Maclaurin et al. \(2015\)](#). In Section **D** we illustrate with codes that Momentum ResNets are a drop-in replacement for ResNets. Section **E** gives details for the experiments in the paper. We derive the formula for backpropagation in Momentum ResNets in Section **F**. Finally, we present additional figures in Section **G**.

### A. Proofs

#### Notations

- $C_0^\infty([0, 1], \mathbb{R}^d)$  is the set of infinitely differentiable functions from  $[0, 1]$  to  $\mathbb{R}^d$  with value 0 in 0.
- If  $f : U \times V \rightarrow W$  is a function, we denote by  $\partial_u f$ , when it exists, the partial derivative of  $f$  with respect to  $u \in U$ .
- For a matrix  $A \in \mathbb{R}^{d \times d}$ , we denote by  $(\lambda - z)^a$  the Jordan block of size  $a \in \mathbb{N}$  associated to the eigenvalue  $z \in \mathbb{C}$ .

#### A.0. Instability of fixed points – Proof of Proposition 1

*Proof.* Since  $(x^*, v^*)$  is a fixed point of the RevNet iteration, we have

$$\varphi(x^*) = 0$$

$$\psi(v^*) = 0$$

Then, a first order expansion, writing  $x = x^* + \varepsilon$  and  $v = v^* + \delta$  gives at order one

$$\Psi(v, x) = (v^* + \delta + A\varepsilon, x^* + \varepsilon + B(\delta + A\varepsilon)) \tag{9}$$

We therefore obtain at order one

$$\Psi(v, x) = \Psi(v^*, x^*) + J(A, B) \begin{pmatrix} \delta \\ \varepsilon \end{pmatrix}$$

which shows that  $J(A, B)$  is indeed the Jacobian of  $\Psi$  at  $(v^*, x^*)$ . We now turn to a study of the spectrum of  $J(A, B)$ . We let  $\lambda \in \mathbb{C}$  an eigenvalue of  $J(A, B)$ , and vectors  $u \in \mathbb{C}^d$ ,  $w \in \mathbb{C}^d$  such that  $(u, w)$  is the corresponding eigenvector, and study the eigenvalue equation

$$J(A, B) \begin{pmatrix} u \\ w \end{pmatrix} = \lambda \begin{pmatrix} u \\ w \end{pmatrix}$$

which gives the two equations

$$u + Aw = \lambda u \tag{10}$$

$$w + Bu + BAu = \lambda w \tag{11}$$

We start by showing that  $\lambda \neq 1$  by contradiction. Indeed, if  $\lambda = 1$ , then (10) gives  $Aw = 0$ , which implies  $w = 0$  since  $A$  is invertible. Then, (11) gives  $Bu = 0$ , which also implies  $u = 0$ . This contradicts the fact that  $(u, w)$  is an eigenvector (which is non-zero by definition).

Then, the first equation (10) gives  $Aw = (\lambda - 1)u$ , and multiplying (11) by  $A$  on the left gives

$$\lambda ABu = (\lambda - 1)^2 u \tag{12}$$

We also cannot have  $\lambda = 0$ , since it would imply  $u = 0$ . Then, dividing (12) by  $\lambda$  shows that  $\frac{(\lambda-1)^2}{\lambda}$  is an eigenvalue of  $AB$ .

Next, we let  $\mu \neq 0$  the eigenvalue of  $AB$  such that  $\mu = \frac{(\lambda-1)^2}{\lambda}$ . The equation can be rewritten as the second order equation

$$\lambda^2 - (2 + \mu)\lambda + 1 = 0$$

This equation has two solutions  $\lambda_1(\mu)$ ,  $\lambda_2(\mu)$ , and since the constant term is 1, we have  $\lambda_1(\mu)\lambda_2(\mu) = 1$ . Taking modulus, we get  $|\lambda_1(\mu)||\lambda_2(\mu)| = 1$ , which shows that necessarily, either  $|\lambda_1(\mu)| \geq 1$  or  $|\lambda_2(\mu)| \geq 1$ .

Now, the previous reasoning is only a necessary condition on the eigenvalues, but we can now prove the advertised result by going backwards: we let  $\mu \neq 0$  an eigenvalue of  $AB$ , and  $u \in \mathbb{C}^d$  the associated eigenvector. We consider  $\lambda$  a solution of  $\lambda^2 - (2 + \mu)\lambda + 1 = 0$  such that  $|\lambda| \geq 1$  and  $\lambda \neq 1$ . Then, we consider  $w = (\lambda - 1)A^{-1}u$ . We just have to verify that  $(u, v)$  is an eigenvector of  $J(A, B)$ . By construction, (10) holds. Next, we have

$$A(w + Bu + BAu) = (\lambda - 1)u + ABu + (\lambda - 1)ABu = (\lambda - 1)u + \lambda ABu$$

Leveraging the fact that  $u$  is an eigenvector of  $AB$ , we have  $\lambda ABu = \lambda\mu u$ , and finally:

$$A(w + Bu + BAu) = (\lambda - 1 + \lambda\mu)u = \lambda(\lambda - 1)u = \lambda Aw$$

Which recovers exactly (11):  $\lambda$  is indeed an eigenvalue of  $J(A, B)$ . □

### A.1. Momentum ResNets in the limit $\varepsilon \rightarrow 0$ – Proof of Proposition 2

*Proof.* We take  $T = 1$  without loss of generality. We are going to use the implicit function theorem. Note that  $x_\varepsilon$  is solution of (6) if and only if  $(x_\varepsilon, v_\varepsilon = \dot{x}_\varepsilon)$  is solution of

$$\begin{cases} \dot{x} &= v, & x(0) = x_0 \\ \varepsilon \dot{v} &= f(x, \theta) - v, & v(0) = v_0. \end{cases}$$

Consider for  $u = (x, v) \in (x_0, v_0) + C_0^\infty([0, 1], \mathbb{R}^d)^2$

$$\Psi(u, \varepsilon) = \left( x_0 - x + \int_0^t v, \int_0^t (f(x, \theta) - v) - \varepsilon v + \varepsilon v_0 \right),$$

so that  $x_\varepsilon$  is solution of (6) if and only if  $u_\varepsilon = (x_\varepsilon, v_\varepsilon = \dot{x}_\varepsilon)$  satisfies  $\Psi(u_\varepsilon, \varepsilon) = 0$ . Let  $u^* = (x^*, \dot{x}^*)$ . One has  $\Psi(u^*, 0) = 0$ .  $\Psi$  is differentiable everywhere, and at  $(u^*, 0)$  we have

$$\partial_u \Psi(u^*, 0)(x, v) = \left( \left( \int_0^t v \right) - x, \int_0^t (\partial_x f(x^*, \theta) \cdot x - v) \right).$$

$\partial_u \Psi(u^*, 0)$  is continuous, and it is invertible with continuous inverse because it is linear and continuous, and because  $\partial_u \Psi(u^*, 0)(x, v) = 0$  if and only if

$$\begin{cases} \forall t \in [0, 1], x(t) = \int_0^t v \\ \forall t \in [0, 1], v(t) = \partial_x f(x^*(t), \theta(t)) \cdot x(t) \end{cases}$$

which is equivalent to

$$\begin{cases} \dot{x} = \partial f(x^*, \theta) \cdot x \\ x(0) = 0 \\ v = \dot{x}, \end{cases}$$

which is equivalent, because this equation is linear to  $(x, v) = (0, 0)$ . Using the implicit function theorem, we know that there exists two neighbourhoods  $U \subset \mathbb{R}$  and  $V \subset (x_0, v_0) + C_0^\infty([0, 1], \mathbb{R}^d)^2$  of 0 and  $u^*$  and a continuous function  $\zeta : U \rightarrow V$  such that

$$\forall (u, \varepsilon) \in U \times V, \Psi(u, \varepsilon) = 0 \Leftrightarrow u = \zeta(\varepsilon)$$

This in particular ensures that  $x_\varepsilon$  converges uniformly to  $x^*$  as  $\varepsilon$  goes to 0 □

## A.2. Momentum ResNets are more general than neural ODEs – Proof of Proposition 3

*Proof.* If  $x$  satisfies (5) we get by derivation that

$$\ddot{x} = \partial_x f(x, \theta) f(x, \theta) + \partial_\theta f(x, \theta) \dot{\theta}$$

Then, if we define  $\hat{f}(x, \theta) = \varepsilon[\partial_x f(x, \theta) f(x, \theta) + \partial_\theta f(x, \theta) \dot{\theta}] + f(x, \theta)$ , we get that  $x$  is also solution of the second-order model  $\varepsilon \ddot{x} + \dot{x} = \hat{f}(x, \theta)$  with  $(x(0), \dot{x}(0)) = (x_0, f(x_0, \theta_0))$ .  $\square$

## A.3. Solution of (7) – Proof of Proposition 4

(7) writes

$$\begin{cases} \dot{x} &= v, & x(0) &= x_0 \\ \dot{v} &= \frac{\theta x - v}{\varepsilon}, & v(0) &= 0. \end{cases}$$

For which the solution at time  $t$  writes

$$\begin{pmatrix} x(t) \\ v(t) \end{pmatrix} = \exp \begin{pmatrix} 0 & \text{Id}_d t \\ \frac{\theta t}{\varepsilon} & -\frac{\text{Id}_d t}{\varepsilon} \end{pmatrix} \cdot \begin{pmatrix} x_0 \\ 0 \end{pmatrix}.$$

The calculation of this exponential gives

$$x(t) = e^{-\frac{t}{2\varepsilon}} \left( \sum_{n=0}^{+\infty} \frac{1}{(2n)!} \left( \frac{\theta}{\varepsilon} + \frac{\text{Id}_d}{4\varepsilon^2} \right)^n t^{2n} + \sum_{n=0}^{+\infty} \frac{1}{2\varepsilon(2n+1)!} \left( \frac{\theta}{\varepsilon} + \frac{\text{Id}_d}{4\varepsilon^2} \right)^n t^{2n+1} \right) x_0.$$

Note that it can be checked directly that this expression satisfies (7) by derivations. At time 1 this effectively gives  $x(1) = \Psi_\varepsilon(\theta)x_0$ .

## A.4. Representable mappings for a Momentum ResNet with linear residual functions – Proof of Theorem 1

In what follows, we denote by  $f_\varepsilon$  the function of matrices defined by

$$f_\varepsilon(\theta) = \Psi_\varepsilon(\varepsilon\theta - \frac{I}{4\varepsilon}) = e^{-\frac{1}{2\varepsilon}} \sum_{n=0}^{+\infty} \left( \frac{1}{(2n)!} + \frac{1}{2\varepsilon(2n+1)!} \right) \theta^n.$$

Because  $\Psi_\varepsilon(\mathbb{R}^{d \times d}) = f_\varepsilon(\mathbb{R}^{d \times d})$ , we choose to work on  $f_\varepsilon$ .

We first need to prove that  $f_\varepsilon$  is surjective on  $\mathbb{C}$ .

### A.4.1. SURJECTIVITY ON $\mathbb{C}$ OF $f_\varepsilon$

**Lemma 1** (Surjectivity of  $f_\varepsilon$ ). *For  $\varepsilon > 0$ ,  $f_\varepsilon$  is surjective on  $\mathbb{C}$ .*

*Proof.* Consider

$$\begin{aligned} F_\varepsilon : \mathbb{C} &\longrightarrow \mathbb{C} \\ z &\longmapsto e^{-\frac{1}{2\varepsilon}} (\cosh(z) + \frac{1}{2\varepsilon z} \sinh(z)). \end{aligned}$$

For  $z \in \mathbb{C}$ , we have  $f_\varepsilon(z^2) = F_\varepsilon(z)$ , and because  $z \mapsto z^2$  is surjective on  $\mathbb{C}$ , it is sufficient to prove that  $F_\varepsilon$  is surjective on  $\mathbb{C}$ . Suppose by contradiction that there exists  $w \in \mathbb{C}$  such that  $\forall z \in \mathbb{C}$ ,  $\exp(\frac{1}{2\varepsilon})F_\varepsilon(z) \neq w$ . Then  $\exp(\frac{1}{2\varepsilon})F_\varepsilon - w$  is an entire function (Levin, 1996) of order 1 with no zeros. Using Hadamard's factorization theorem (Conway, 2012), this implies that there exists  $a, b \in \mathbb{C}$  such that  $\forall z \in \mathbb{C}$ ,

$$\cosh(z) + \frac{\sinh(z)}{2\varepsilon z} - w = \exp(az + b).$$

However, since  $F_\varepsilon$  is an even function one has that  $\forall z \in \mathbb{C}$

$$\exp(az + b) = \exp(-az + b)$$

so that  $\forall z \in \mathbb{C}$ ,  $2az \in 2i\pi\mathbb{Z}$ . Necessarily,  $a = 0$ , which is absurd because  $F_\varepsilon$  is not constant.  $\square$

We first prove Theorem 1 in the diagonalizable case.

#### A.4.2. THEOREM 1 IN THE DIAGONALIZABLE CASE

*Proof. Necessity* Suppose that  $D$  can be represented by a second-order model (7). This means that there exists a real matrix  $X$  such that  $D = f_\varepsilon(X)$  with  $X$  real and

$$f_\varepsilon(X) = e^{-\frac{1}{2\varepsilon}} \left( \sum_{n=0}^{+\infty} a_n^\varepsilon X^n \right)$$

with

$$a_n^\varepsilon = \frac{1}{(2n)!} + \frac{1}{2\varepsilon(2n+1)!}.$$

$X$  commutes with  $D$  so that there exists  $P \in \text{GL}_d(\mathbb{C})$  such that  $P^{-1}DP$  is diagonal and  $P^{-1}XP$  is triangular. Because  $f_\varepsilon(P^{-1}XP) = P^{-1}DP$ , we have that  $\forall \lambda \in \text{Sp}(D)$ , there exists  $z \in \text{Sp}(X)$  such that  $\lambda = f_\varepsilon(z)$ . Because  $\lambda < \lambda_\varepsilon$ , necessarily,  $z \in \mathbb{C} - \mathbb{R}$ . In addition,  $\lambda = f_\varepsilon(z) = \bar{\lambda} = f_\varepsilon(\bar{z})$ . Because  $X$  is real, each  $z \in \text{Sp}(X)$  must be associated with  $\bar{z}$  in  $P^{-1}XP$ . Thus,  $\lambda$  appears in pairs in  $P^{-1}DP$ .

**Sufficiency** Now, suppose that  $\forall \lambda \in \text{Sp}(D)$  with  $\lambda < \lambda_\varepsilon$ ,  $\lambda$  is of even multiplicity order. We are going to exhibit a  $X$  real such that  $D = f_\varepsilon(X)$ . Thanks to Lemma 1, we have that  $f_\varepsilon$  is surjective. Let  $\lambda \in \text{Sp}(D)$ .

- If  $\lambda \in \mathbb{R}$  and  $\lambda < \lambda_\varepsilon$  or  $\lambda \in \mathbb{C} - \mathbb{R}$  then there exists  $z \in \mathbb{C} - \mathbb{R}$  by Lemma 1 such that  $\lambda = f_\varepsilon(z)$ .
- If  $\lambda \in \mathbb{R}$  and  $\lambda \geq \lambda_\varepsilon$ , then because  $f_\varepsilon$  is continuous and goes to infinity when  $x \in \mathbb{R}$  goes to infinity, there exists  $x \in \mathbb{R}$  such that  $\lambda = f_\varepsilon(x)$ .

In addition, there exist  $(\alpha_1, \dots, \alpha_k) \in (\mathbb{C} - \mathbb{R})^k \cup [-\infty, \lambda_\varepsilon[{}^k$ ,  $(\beta_1, \dots, \beta_p) \in [\lambda_\varepsilon, +\infty]^p$  such that

$$D = Q^{-1}\Delta Q,$$

with  $Q \in \text{GL}_d(\mathbb{R})$ , and

$$\Delta = \begin{pmatrix} P_1^{-1}D_{\alpha_1}P_1 & 0_2 & \cdots & \cdots & \cdots & 0_2 \\ 0_2 & \ddots & \cdots & \cdots & \cdots & 0_2 \\ \vdots & \vdots & P_k^{-1}D_{\alpha_k}P_k & 0_2 & \cdots & 0_2 \\ 0 & \cdots & \cdots & \beta_1 & \cdots & 0 \\ 0 & \cdots & \cdots & 0 & \ddots & 0 \\ 0 & \cdots & \cdots & \cdots & \cdots & \beta_p \end{pmatrix} \in \mathbb{R}^{d \times d}$$

with  $P_j \in \text{GL}_2(\mathbb{C})$  and  $D_{\alpha_j} = \begin{pmatrix} \alpha_j & 0 \\ 0 & \bar{\alpha}_j \end{pmatrix}$ .

Let  $(z_1, \dots, z_k) \in (\mathbb{C} - \mathbb{R})^k$  and  $(x_1, \dots, x_p) \in \mathbb{R}^p$  be such that  $f_\varepsilon(z_j) = \alpha_j$  and  $f_\varepsilon(x_j) = \beta_j$ . For  $1 \leq j \leq k$ , one has  $P_j^{-1}D_{z_j}P_j \in \mathbb{R}^{2 \times 2}$ . Indeed, writing  $\alpha_j = a_j + ib_j$  with  $a_j, b_j \in \mathbb{R}$ , the fact that  $P_j^{-1}D_{\alpha_j}P_j \in \mathbb{R}^{2 \times 2}$  implies that

$i \begin{pmatrix} 1 & 0 \\ 0 & -1 \end{pmatrix} \in i\mathbb{R}^{2 \times 2}$ . Writing  $z_j = u_j + iv_j$  with  $u_j, v_j \in \mathbb{R}$ , we get that  $P_j^{-1}D_{z_j}P_j \in \mathbb{R}^{2 \times 2}$ . Then

$$X = Q \begin{pmatrix} P_1^{-1}D_{z_1}P_1 & 0_2 & \cdots & \cdots & \cdots & 0_2 \\ 0_2 & \ddots & \cdots & \cdots & \cdots & 0_2 \\ \vdots & \vdots & P_k^{-1}D_{z_k}P_k & 0_2 & \cdots & 0_2 \\ 0 & \cdots & \cdots & x_1 & \cdots & 0 \\ 0 & \cdots & \cdots & 0 & \ddots & 0 \\ 0 & \cdots & \cdots & \cdots & \cdots & x_p \end{pmatrix} Q^{-1} \in \mathbb{R}^{d \times d}$$

is such that  $f_\varepsilon(X) = D$ , and  $D$  is represented by a second-order model (7). □

We now state and demonstrate the general version of Theorem 1.

First, we need to demonstrate properties of the complex derivatives of the entire function  $f_\varepsilon$ .

A.4.3. THE ENTIRE FUNCTION  $f_\varepsilon$  HAS A DERIVATIVE WITH NO-ZEROS ON  $\mathbb{C} - \mathbb{R}$ .

**Lemma 2** (On the zeros of  $f'_\varepsilon$ ).  $\forall z \in \mathbb{C} - \mathbb{R}$  we have  $f'_\varepsilon(z) \neq 0$ .

*Proof.* One has

$$G_\varepsilon(z) = e^{-\frac{1}{2\varepsilon}} (\cos(z) + \frac{1}{2\varepsilon z} \sin(z)) = f_\varepsilon(-z^2)$$

so that  $G'_\varepsilon(z) = -2zf'_\varepsilon(-z^2)$  and it is sufficient to prove that the zeros of  $G'_\varepsilon$  are all real.

We first show that  $G_\varepsilon$  belongs to the Laguerre-Pólya class (Craven & Csordas, 2002). The Laguerre-Pólya class is the set of entire functions that are the uniform limits on compact sets of  $\mathbb{C}$  of polynomials with only real zeros. To show that  $G_\varepsilon$  belongs to the Laguerre-Pólya class, it is sufficient to show (Dryanov & Rahman, 1999, p. 22) that:

- The zeros of  $G_\varepsilon$  are all real.
- If  $(z_n)_{n \in \mathbb{N}}$  denotes the sequence of real zeros of  $G_\varepsilon$ , one has  $\sum \frac{1}{|z_n|^2} < \infty$ .
- $G_\varepsilon$  is of order 1.

First, the zeros of  $G_\varepsilon$  are all real, as demonstrated in Runckel (1969). Second, if  $(z_n)_{n \in \mathbb{N}}$  denotes the sequence of real zeros of  $G_\varepsilon$ , one has  $z_n \sim n\pi + \frac{\pi}{2}$  as  $n \rightarrow \infty$ , so that  $\sum \frac{1}{|z_n|^2} < \infty$ . Third,  $G_\varepsilon$  is of order 1. Thus, we have that  $G_\varepsilon$  is indeed in the Laguerre-Pólya class.

This class being stable under differentiation, we get that  $G'_\varepsilon$  also belongs to the Laguerre-Pólya class. So that the roots of  $G'_\varepsilon$  are all real, and hence those of  $f'_\varepsilon$  as well. □

#### A.4.4. THEOREM 1 IN THE GENERAL CASE

When  $\varepsilon = 0$ , we have in the general case the following from Culver (1966):

Let  $A \in \mathbb{R}^{d \times d}$ . Then  $A$  can be represented by a first-order model (8) **if and only if**  $A$  is not singular and each Jordan block of  $A$  corresponding to an eigen value  $\lambda < 0$  occurs an even number of time.

We now state and demonstrate the equivalent of this result for second order models (7).

**Theorem 2** (Representable mappings for a Momentum ResNet with linear residual functions – General case). *Let  $A \in \mathbb{R}^{d \times d}$ .*

*If  $A$  can be represented by a second-order model (7), then each Jordan block of  $A$  corresponding to an eigen value  $\lambda < \lambda_\varepsilon$  occurs an even number of time.*

*Reciprocally, if each Jordan block of  $A$  corresponding to an eigen value  $\lambda \leq \lambda_\varepsilon$  occurs an even number of time, then  $A$  can be represented by a second-order model.*

*Proof.* We refer to the arguments from [Culver \(1966\)](#) and use results from [Gantmacher \(1959\)](#) for the proof.

Suppose that  $A$  can be represented by a second-order model (7). This means that there exists  $X \in \mathbb{R}^{d \times d}$  such that  $A = f_\varepsilon(X)$ . The fact that  $X$  is real implies that its Jordan blocks are:

$$\begin{aligned} &(\lambda - z_k)^{a_k}, z_k \in \mathbb{R} \\ &(\lambda - z_k)^{b_k} \text{ and } (\lambda - \bar{z}_k)^{b_k}, z_k \in \mathbb{C} - \mathbb{R}. \end{aligned}$$

Let  $\lambda_k = f_\varepsilon(z_k)$  be an eigenvalue of  $A$  such that  $\lambda_k < \lambda_\varepsilon$ . Necessarily,  $z_k \in \mathbb{C} - \mathbb{R}$ , and  $f'_\varepsilon(z_k) \neq 0$  thanks to [Lemma 2](#). We then use [Theorem 9](#) from [Gantmacher \(1959\)](#) (p. 158) to get that the Jordan blocks of  $A$  corresponding to  $\lambda_k$  are

$$(\lambda - f_\varepsilon(z_k))^{b_k} \text{ and } (\lambda - f_\varepsilon(\bar{z}_k))^{b_k}.$$

Since  $f_\varepsilon(\bar{z}_k) = f_\varepsilon(z_k) = \lambda_k$ , we can conclude that the Jordan blocks of  $A$  corresponding to  $\lambda_k < \lambda_\varepsilon$  occur an even number of times.

Now, suppose that each Jordan block of  $A$  corresponding to an eigen value  $\lambda \leq \lambda_\varepsilon$  occurs an even number of times. Let  $\lambda_k$  be an eigenvalue of  $A$ .

- If  $\lambda_k \in \mathbb{C} - \mathbb{R}$  we can write, because  $f_\varepsilon$  is surjective (proved in [Lemma 1](#)),  $\lambda_k = f_\varepsilon(z_k)$  with  $z_k \in \mathbb{C} - \mathbb{R}$ . Necessarily, because  $A$  is real, the Jordan blocks of  $A$  corresponding to  $\lambda_k$  have to be associated to those corresponding to  $\bar{\lambda}_k$ . In addition, thanks to [Lemma 2](#),  $f'_\varepsilon(z_k) \neq 0$
- If  $\lambda_k < \lambda_\varepsilon$ , we can write, because  $f_\varepsilon$  is surjective,  $\lambda_k = f_\varepsilon(z_k) = f_\varepsilon(\bar{z}_k)$  with  $z_k \in \mathbb{C} - \mathbb{R}$ . In addition,  $f'_\varepsilon(z_k) \neq 0$ .
- If  $\lambda_k > \lambda_\varepsilon$ , then there exists  $z_k \in \mathbb{R}$  such that  $\lambda_k = f_\varepsilon(z_k)$  and  $f'_\varepsilon(z_k) \neq 0$  because, if  $x_\varepsilon$  is such that  $f_\varepsilon(x_\varepsilon) = \lambda_\varepsilon$ , we have that  $f'_\varepsilon > 0$  on  $]x_\varepsilon, +\infty[$ .
- If  $\lambda_k = \lambda_\varepsilon$ , there exists  $z_k \in \mathbb{R}$  such that  $\lambda_k = f_\varepsilon(z_k)$ . Necessarily,  $f'_\varepsilon(z_k) = 0$  but  $f''_\varepsilon(z_k) \neq 0$ .

This shows that the Jordan blocks of  $A$  are necessarily of the form

$$\begin{aligned} &(\lambda - f_\varepsilon(z_k))^{b_k} \text{ and } (\lambda - f_\varepsilon(\bar{z}_k))^{b_k}, z_k \in \mathbb{C} - \mathbb{R} \\ &(\lambda - f_\varepsilon(z_k))^{a_k}, z_k \in \mathbb{R}, f_\varepsilon(z_k) \neq \lambda_\varepsilon \\ &(\lambda - \lambda_\varepsilon)^{c_k} \text{ and } (\lambda - \lambda_\varepsilon)^{c_k}. \end{aligned}$$

Let  $Y \in \mathbb{R}^{d \times d}$  be such that its Jordan blocks are of the form

$$\begin{aligned} &(\lambda - z_k)^{b_k} \text{ and } (\lambda - \bar{z}_k)^{b_k}, z_k \in \mathbb{C} - \mathbb{R}, f'_\varepsilon(z_k) \neq 0 \\ &(\lambda - z_k)^{a_k}, z_k \in \mathbb{R}, f_\varepsilon(z_k) \neq \lambda_\varepsilon, f'_\varepsilon(z_k) \neq 0 \\ &(\lambda - z_k)^{2c_k}, z_k \in \mathbb{R}, f_\varepsilon(z_k) = \lambda_\varepsilon. \end{aligned}$$

Then again by the use of [Theorem 7](#) from [Gantmacher \(1959\)](#) (p. 158), because if  $f_\varepsilon(z_k) = \lambda_\varepsilon$  with  $z_k \in \mathbb{R}$ ,  $f''_\varepsilon(z_k) \neq 0$ , we have that  $f_\varepsilon(Y)$  is similar to  $A$ . Thus  $A$  writes  $A = P^{-1}f_\varepsilon(Y)P = f_\varepsilon(P^{-1}YP)$  with  $P \in \text{GL}_d(\mathbb{R})$ . Then,  $X = P^{-1}YP$  satisfies  $X \in \mathbb{R}^{d \times d}$  and  $f_\varepsilon(X) = A$ .  $\square$

## B. Additional theoretical results

### B.1. On the convergence of the solution of a second order model when $\varepsilon \rightarrow \infty$

**Proposition 5** (Convergence of the solution when  $\varepsilon \rightarrow +\infty$ ). *We let  $x^*$  (resp.  $x_\varepsilon$ ) be the solution of  $\ddot{x} = f(x, \theta)$  (resp.  $\ddot{x} + \frac{1}{\varepsilon}\dot{x} = f(x, \theta)$ ) on  $[0, T]$ , with initial conditions  $x^*(0) = x_\varepsilon(0) = x_0$  and  $\dot{x}^*(0) = \dot{x}_\varepsilon(0) = v_0$ . Then  $x_\varepsilon$  converges uniformly to  $x^*$  as  $\varepsilon \rightarrow +\infty$ .*

*Proof.* The equation  $\ddot{x} + \frac{1}{\varepsilon}\dot{x} = f(x, \theta)$  with  $x_\varepsilon(0) = x_0, \dot{x}_\varepsilon(0) = v_0$  writes in phase space  $(x, v)$

$$\begin{cases} \dot{x} = v, & x(0) = x_0 \\ \dot{v} = f(x, \theta) - \frac{v}{\varepsilon}, & v(0) = v_0. \end{cases}$$

It then follows from the Cauchy-Lipschitz Theorem with parameters (Perko, 2013, Theorem 2, Chapter 2) that the solutions of this system are continuous in the parameter  $\frac{1}{\varepsilon}$ . That is  $x_\varepsilon$  converges uniformly to  $x^*$  as  $\varepsilon \rightarrow +\infty$ . □

## B.2. Universality of Momentum ResNets

**Proposition 6** (When  $v_0$  is free any mapping can be represented). *Consider  $h : \mathbb{R}^d \rightarrow \mathbb{R}^d$ , and the ODE*

$$\begin{aligned} \ddot{x} + \dot{x} &= 0 \\ (x(0), \dot{x}(0)) &= (x_0, \frac{h(x_0) - x_0}{1 - 1/e}) \end{aligned}$$

Then  $\varphi_1(x_0) = h(x_0)$ .

*Proof.* This is because the solution is  $\varphi_t(x_0) = x_0 - v_0(e^{-t} - 1)$ . □

## B.3. Non-universality of Momentum ResNets when $v_0 = 0$

**Proposition 7** (When  $v_0 = 0$  there are mappings that cannot be learned if the equation is autonomous.). *When  $d = 1$ , consider the autonomous ODE*

$$\begin{aligned} \varepsilon\ddot{x} + \dot{x} &= f(x) \\ (x(0), \dot{x}(0)) &= (x_0, 0) \end{aligned} \tag{13}$$

*If there exists  $x_0 \in \mathbb{R}^{+*}$  such that  $h(x_0) \leq -x_0$  and  $x_0 \leq h(-x_0)$  then  $h$  cannot be represented by (13).*

This in particular proves that  $x \mapsto \lambda x$  for  $\lambda \leq -1$  cannot be represented by this ODE with initial conditions  $(x_0, 0)$ .

*Proof.* Consider such an  $x_0$  and  $h$ . Since  $\varphi_1(x_0) = h(x_0) \leq -x_0$ , that  $\varphi_0(x_0) = x_0$  and that  $t \mapsto \varphi_t(x_0)$  is continuous, we know that there exists  $t_0 \in [0, 1]$  such that  $\varphi_{t_0}(x_0) = -x_0$ . We denote  $x(t) = \varphi_t(x_0)$ , solution of

$$\ddot{x} + \frac{1}{\varepsilon}\dot{x} = f(x)$$

Since  $d = 1$ , one can write  $f$  as a derivative:  $f = -E'$ . The energy  $E_m = \frac{1}{2}\dot{x}^2 + E$  satisfies:

$$E_m^i = -\frac{1}{\varepsilon}\dot{x}^2$$

So that

$$E_m(t_0) - E_m(0) = -\frac{1}{\varepsilon} \int_0^{t_0} \dot{x}^2$$

In other words:

$$\frac{1}{2}v(t_0)^2 + \frac{1}{\varepsilon} \int_0^{t_0} \dot{x}^2 + E(-x_0) = E(x_0)$$

So that  $E(-x_0) \leq E(x_0)$  We now apply the exact same argument to the solution starting at  $x_1 = -x_0$ . Since  $x_0 \leq h(-x_0) = h(x_1)$  there exists  $t_1 \in [0, 1]$  such that  $\varphi_{t_1}(x_1) = x_0$ . So that:

$$\frac{1}{2}v(t_1)^2 + \frac{1}{\varepsilon} \int_0^{t_1} \dot{x}^2 + E(x_0) = E(-x_0)$$

So that  $E(x_0) \leq E(-x_0)$ . We get that

$$E(x_0) = E(-x_0)$$

This implies that  $\dot{x} = 0$  on  $[0, t_0]$ , so that the first solution is constant and  $x_0 = -x_0$  which is absurd because  $x_0 \in \mathbb{R}^*$ . □

**B.4. When  $v_0 = 0$  there are mappings that can be represented by a second-order model but not by a first-order one.**

**Proposition 8.** *There exists  $f$  such that the solution of*

$$\ddot{x} + \frac{1}{\varepsilon}\dot{x} = f(x)$$

with initial condition  $(x_0, 0)$  at time 1 is

$$x(1) = -x_0 \times \exp\left(-\frac{1}{2\varepsilon}\right)$$

*Proof.* Consider the ODE

$$\ddot{x} + \frac{1}{\varepsilon}\dot{x} = \left(-\pi^2 - \frac{1}{4\varepsilon^2}\right)x \tag{14}$$

with initial condition  $(x_0, 0)$  The solution of this ODE is

$$x(t) = x_0 e^{-\frac{t}{2\varepsilon}} \left( \cos(\pi t) + \frac{1}{2\pi\varepsilon} \sin(\pi t) \right)$$

which at time 1 gives:

$$x(1) = -x_0 e^{-\frac{1}{2\varepsilon}}$$

□

### B.5. Orientation preservation of first-order ODEs

**Proposition 9** (The homeomorphisms represented by (5) are orientation preserving.). *If  $K \subset \mathbb{R}^d$  is a compact set and  $h : K \rightarrow \mathbb{R}^d$  is a homeomorphism represented by (5), then  $h$  is in the connected component of the identity function on  $K$  for the  $\|\cdot\|_\infty$  topology.*

We first prove the following:

**Lemma 3.** *Consider  $K \subset \mathbb{R}^d$  a compact set. Suppose that  $\forall x \in K, \Phi_t(x)$  is defined for all  $t \in [0, 1]$ . Then*

$$C = \{\Phi_t(x) \mid x \in K, t \in [0, 1]\}$$

*is compact as well.*

*Proof.* We consider  $(\Phi_{t_n}(x_n))_{n \in \mathbb{N}}$  a sequence in  $C$ . Since  $K \times [0, 1]$  is compact, we can extract sub sequences  $(t_{\varphi(n)})_{n \in \mathbb{N}}$ ,  $(x_{\varphi(n)})_{n \in \mathbb{N}}$  that converge respectively to  $t_0$  and  $x_0$ . We denote them  $(t_n)_{n \in \mathbb{N}}$  and  $(x_n)_{n \in \mathbb{N}}$  again for simplicity of the notations. We have that:

$$\|\Phi_{t_n}(x_n) - \Phi_t(x)\| \leq \|\Phi_{t_n}(x_n) - \Phi_{t_n}(x)\| + \|\Phi_{t_n}(x) - \Phi_t(x)\|.$$

Thanks to Gronwall's lemma, we have

$$\|\Phi_{t_n}(x_n) - \Phi_{t_n}(x)\| \leq \|x_n - x\| \exp(kt_n),$$

where  $k$  is  $f$ 's Lipschitz constant. So that  $\|\Phi_{t_n}(x_n) - \Phi_{t_n}(x)\| \rightarrow 0$  as  $n \rightarrow \infty$ . In addition, it is obvious that  $\|\Phi_{t_n}(x) - \Phi_t(x)\| \rightarrow 0$  as  $n \rightarrow \infty$ . We conclude that

$$\Phi_{t_n}(x_n) \rightarrow \Phi_t(x) \in C,$$

so that  $C$  is compact. □

*Proof.* Let's denote by  $H$  the set of homeomorphisms defined on  $K$ . The application

$$\Psi : [0, 1] \rightarrow H$$

defined by

$$\Psi(t) = \Phi_t$$



is continuous. Indeed, we have for any  $x_0$  in  $\mathbb{R}^d$  that

$$\|\Phi_{t+\varepsilon}(x_0) - \Phi_t(x_0)\| = \left\| \int_t^{t+\varepsilon} f(\Phi_s(x_0)) ds \right\| \leq \varepsilon M_f,$$

where  $M_f$  bounds the continuous function  $f$  on  $C$  defined in lemma 3. Since  $M_f$  does not depend on  $x_0$ , we have that

$$\|\Phi_{t+\varepsilon} - \Phi_t\|_\infty \rightarrow 0$$

as  $\varepsilon \rightarrow 0$ , which proves that  $\Psi$  is continuous. Since  $\Psi(0) = Id_K$ , we get that  $\forall t \in [0, 1]$ ,  $\Phi_t$  is connected to  $Id_K$ .  $\square$

### B.6. On the linear mappings represented by autonomous first order ODEs in dimension 1

Consider the autonomous ODE

$$\dot{x} = f(x), \tag{15}$$

**Theorem 3** (Linearity). *Suppose  $d = 1$ . If (15) represents a linear mapping  $x \mapsto ax$  at time 1, we have that  $f$  is linear.*

*Proof.* If  $a = 1$ , consider some  $x_0 \in \mathbb{R}$ . Since  $\Phi_1(x_0) = x_0 = \Phi_0(x_0)$ , there exists, by Rolle's Theorem a  $t_0 \in [0, 1]$  such that  $\dot{x}(t_0) = 0$ . Then  $f(x(t_0)) = 0$ . But since the constant solution  $y = x(t_0)$  then solves  $\dot{y} = f(y)$ ,  $y(0) = x(t_0)$ , we get by the unicity of the solutions that  $x(t_0) = y(0) = x(1) = y(1 - t_0) = x_0$ . So that  $f(x_0) = f(x(t_0)) = 0$ . Since this is true for all  $x_0$ , we get that  $f = 0$ . We now consider the case where  $a \neq 1$  and  $a > 0$ . Consider some  $x_0 \in \mathbb{R}^*$ . If  $f(x_0) = 0$ , then the solution constant to  $x_0$  solves (3), and thus cannot reach  $ax_0$  at time 1 because  $a \neq 1$ . Thus,  $f(x_0) \neq 0$  if  $x_0 \neq 0$ . Second, if the trajectory starting at  $x_0 \in \mathbb{R}^*$  crosses 0 and  $f(0) = 0$ , then by the same argument we know that  $x_0 = 0$ , which is absurd. So that,  $\forall x_0 \in \mathbb{R}^*$ ,  $\forall t \in [0, 1]$ ,  $f(\Phi_t(x_0)) \neq 0$ . We can thus rewrite (3) as

$$\frac{\dot{x}}{f(x)} = 1. \tag{16}$$

Consider  $F$  a primitive of  $\frac{1}{f}$ . Integrating (16), we get

$$F(ax_0) - F(x_0) = \int_0^1 F'(x(t))\dot{x}(t)dt = 1.$$

In other words,  $\forall x \in \mathbb{R}^*$ :

$$F(ax) = F(x) + 1.$$

We derive this equation and get:

$$af(x) = f(ax).$$

This proves that  $f(0) = 0$ . We now suppose that  $a > 1$ . We also have that

$$a^n f\left(\frac{x}{a^n}\right) = f(x).$$

But when  $n \rightarrow \infty$ ,  $f\left(\frac{x}{a^n}\right) = \frac{x}{a^n} f'(0) + o\left(\frac{1}{a^n}\right)$  so that

$$f(x) = f'(0)x$$

and  $f$  is linear. The case  $a < 1$  treats similarly by changing  $a^n$  to  $a^{-n}$ .  $\square$

### B.7. There are mappings that are connected to the identity that cannot be represented by a first order autonomous ODE

In bigger dimension, we can exhibit a matrix in  $GL_d^+(\mathbb{R})$  (and hence connected to the identity) that cannot be represented by the autonomous ODE (15).

**Proposition 10** (A non-representable matrix). *Consider the matrix*

$$A = \begin{pmatrix} -1 & 0 \\ 0 & -\lambda \end{pmatrix},$$

where  $\lambda > 0$  and  $\lambda \neq 1$ . Then  $A \in GL_2^+(\mathbb{R}) - GL_2(\mathbb{R})^2$  and  $A$  cannot be represented by (15).

*Proof.* The fact that  $A \in GL_2^+(\mathbb{R}) - GL_2(\mathbb{R})^2$  is because  $A$  has two single negative eigenvalues, and because  $\det(A) = \lambda > 0$ . We consider the point  $(0, 1)$ . At time 1, it has to be in  $(0, -\lambda)$ . Because the trajectory are continuous, there exists  $0 < t_0 < 1$  such that the trajectory is at  $(x, 0)$  at time  $t_0$ , and thus at  $(-x, 0)$  at time  $t_0 + 1$ , and again at  $(x, 0)$  at time  $t_0 + 2$ . However, the particle is at  $(0, \lambda^2)$  at time 2. All of this is true because the equation is autonomous. Now, we showed that trajectories starting at  $(0, 1)$  and  $(0, \lambda^2)$  would intersect at time  $t_0$  at  $(x, 0)$ , which is absurd. Figure 11 illustrates the paradox.  $\square$

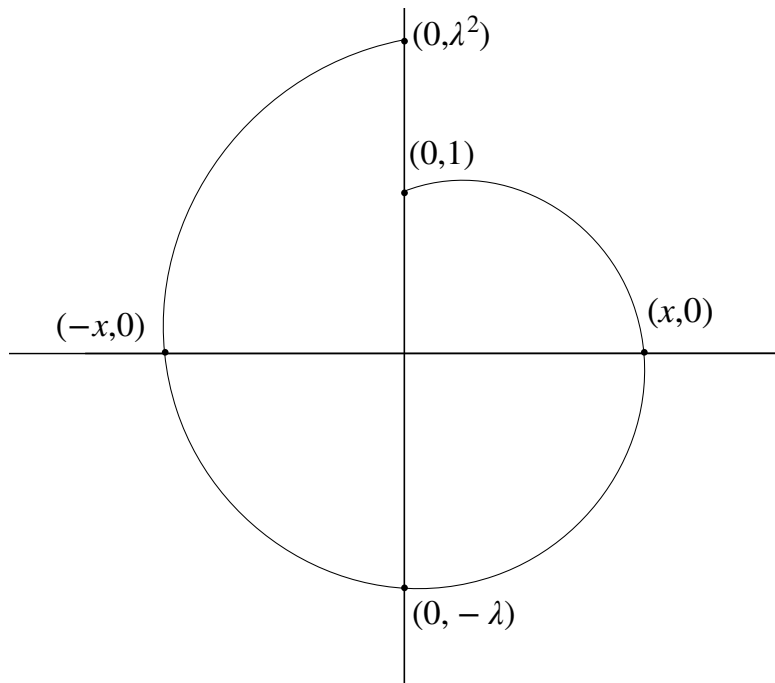

Figure 11. Illustration of Proposition 10. The points starting at  $(0, 1)$  and  $(0, \lambda^2)$  are distinct but their associated trajectories would have to intersect in  $(x, 0)$ , which is impossible.

### C. Exact multiplication

---

**Algorithm 1** Exactly reversible multiplication by a ratio, from [Maclaurin et al. \(2015\)](#)

---

- 1: **Input:** Information buffer  $i$ , value  $c$ , ratio  $n/d$
  - 2:  $i = i \times d$
  - 3:  $i = i + (c \bmod d)$
  - 4:  $c = c \div d$
  - 5:  $c = c \times n$
  - 6:  $c = c + (i \bmod n)$
  - 7:  $i = i \div n$
  - 8: **return** updated buffer  $i$ , updated value  $c$
- 

We here present the algorithm from [Maclaurin et al. \(2015\)](#). In their paper, the authors represent  $\gamma$  as a rational number,  $\gamma = \frac{n}{d} \in \mathbb{Q}$ . The information is lost during the integer division of  $v_n$  by  $d$  in (2). To store this information, it is sufficient to store the remainder  $r$  of this integer division.  $r$  is stored in an “information buffer”  $i$ . To update  $i$ , one has to left-shift the bits in  $i$  by multiplying it by  $n$  before adding  $r$ . The entire procedure is illustrated in Algorithm 1 from [Maclaurin et al. \(2015\)](#).

## D. Implementation details

### D.1. Creating a Momentum ResNet with a MLP

```
import torch
import torch.nn as nn
from momentumnet import MomentumNet

function = nn.Sequential(nn.Linear(2, 16), nn.Tanh(), nn.Linear(16, 2))

mom_net = MomentumNet([function, ], gamma=0.9, n_iters=15)
```

### D.2. Drop-in replacement

To illustrate the fact that Momentum ResNets are a drop-in replacement for ResNets, we implement a function

```
transform(model, pretrained=False, gamma=0.9)
```

This function takes a torchvision model ResNet and returns its Momentum ResNet counterpart. The Momentum ResNet can be initialized with weights of a pretrained ResNet on ImageNet, and hence, as we show in this paper, quickly achieves great performances on new datasets.

This method can be used as follow:

```
mresnet152 = transform(resnet152(pretrained=True), pretrained=True)
```

and is made available in the code.

## E. Experiment details

In all our image experiments, we use Nvidia Tesla V100 GPUs.

For our experiments on CIFAR-10 and 100, we used a batch-size of 128 and we employed SGD with a momentum of 0.9. The training was done over 220 epochs. The initial learning rate was 0.01 and was decayed by a factor 10 at epoch 180. A constant weight decay was set to  $5 \times 10^{-4}$ . Standard inputs preprocessing as proposed in Pytorch (Paszke et al., 2017) was performed.

For our experiments on ImageNet, we used a batch-size of 256 and we employed SGD with a momentum of 0.9. The training was done over 100 epochs. The initial learning rate was 0.1 and was decayed by a factor 10 every 30 epochs. A constant weight decay was set to  $10^{-4}$ . Standard inputs preprocessing as proposed in Pytorch (Paszke et al., 2017) was performed: normalization, random cropping of size  $224 \times 224$  pixels, random horizontal flip.

For our experiments in the continuous framework, we adapted the code made available by Chen et al. (2018) to work on the CIFAR-10 data set and to solve second order ODEs. We used a batch-size of 128, and used SGD with a momentum of 0.9. The initial learning rate was set to 0.1 and reduced by a factor 10 at iteration 60. The training was done over 120 epochs.

For the learning to optimize experiment, we generate a random Gaussian matrix  $D$  of size  $16 \times 32$ . The columns are then normalized to unit variance. We train the networks by stochastic gradient descent for 10000 iterations, with a batch-size of 1000 and a learning rate of 0.001. The samples  $y_q$  are generated as follows: we first sample a random Gaussian vector  $\tilde{y}_q$ , and then we use  $y_q = \frac{\tilde{y}_q}{\|D^\top \tilde{y}_q\|_\infty}$ , which ensures that every sample verify  $\|D^\top y_q\|_\infty = 1$ . This way, we know that the solution  $x^*$  is zero if and only if  $\lambda \geq 1$ . The regularization is set to  $\lambda = 0.1$ .

## F. Backpropagation for Momentum ResNets

In order to backpropagate the gradient of some loss in a Momentum ResNet, we need to formulate an explicit version of (2). Indeed, (2) writes explicitly

$$\begin{aligned} v_{n+1} &= \gamma v_n + (1 - \gamma) f(x_n, \theta_n) \\ x_{n+1} &= x_n + (\gamma v_n + (1 - \gamma) f(x_n, \theta_n)). \end{aligned} \quad (17)$$

Writing  $z = (x, v)$ , the backpropagation for Momentum ResNets then writes, for some loss  $L$

$$\begin{aligned} \nabla_{z_{k-1}} L &= \begin{bmatrix} I + (1 - \gamma) \partial_x f(x_{k-1}, \theta_{k-1}) & \gamma I \\ (1 - \gamma) \partial_x f(x_{k-1}, \theta_{k-1}) & \gamma I \end{bmatrix}^T \nabla_{z_k} L \\ \nabla_{\theta_{k-1}} L &= (1 - \gamma) \begin{bmatrix} \partial_\theta f(x_{k-1}, \theta_{k-1}) \\ \partial_\theta f(x_{k-1}, \theta_{k-1}) \end{bmatrix}^T \nabla_{z_k} L. \end{aligned}$$

We implement these formula to obtain a custom Jacobian-vector product in Pytorch.

## G. Additional figures

### G.1. Learning curves on CIFAR-10

We here show the learning curves when training a ResNet-101 and a Momentum ResNet-101 on CIFAR-10.

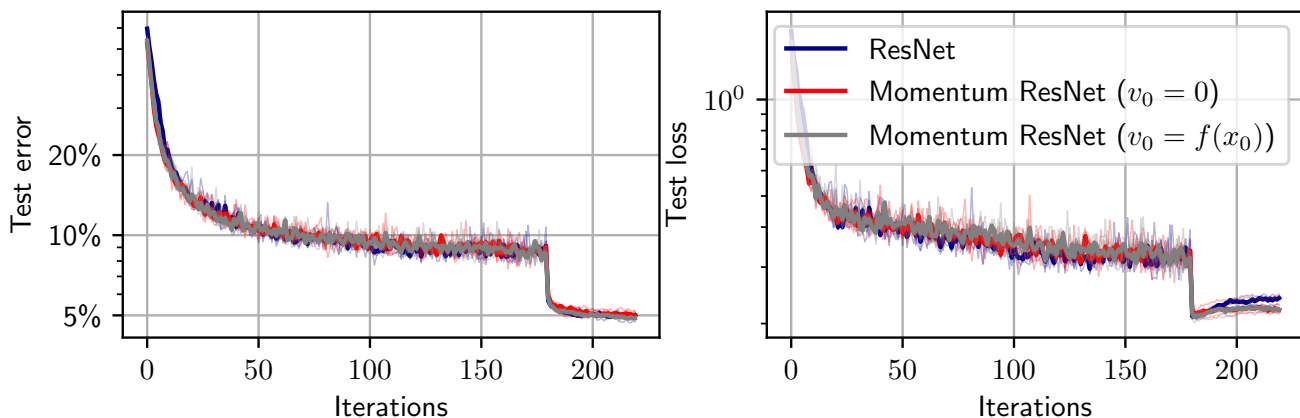

Figure 12. Test error and test loss as a function of depth on CIFAR-10 with a ResNet-101 and two Momentum ResNets-101.
